# Supplementary material
Source: PubMed Central journal article supplement (PMC2928635)

Fig. 1 (suppl. merged)

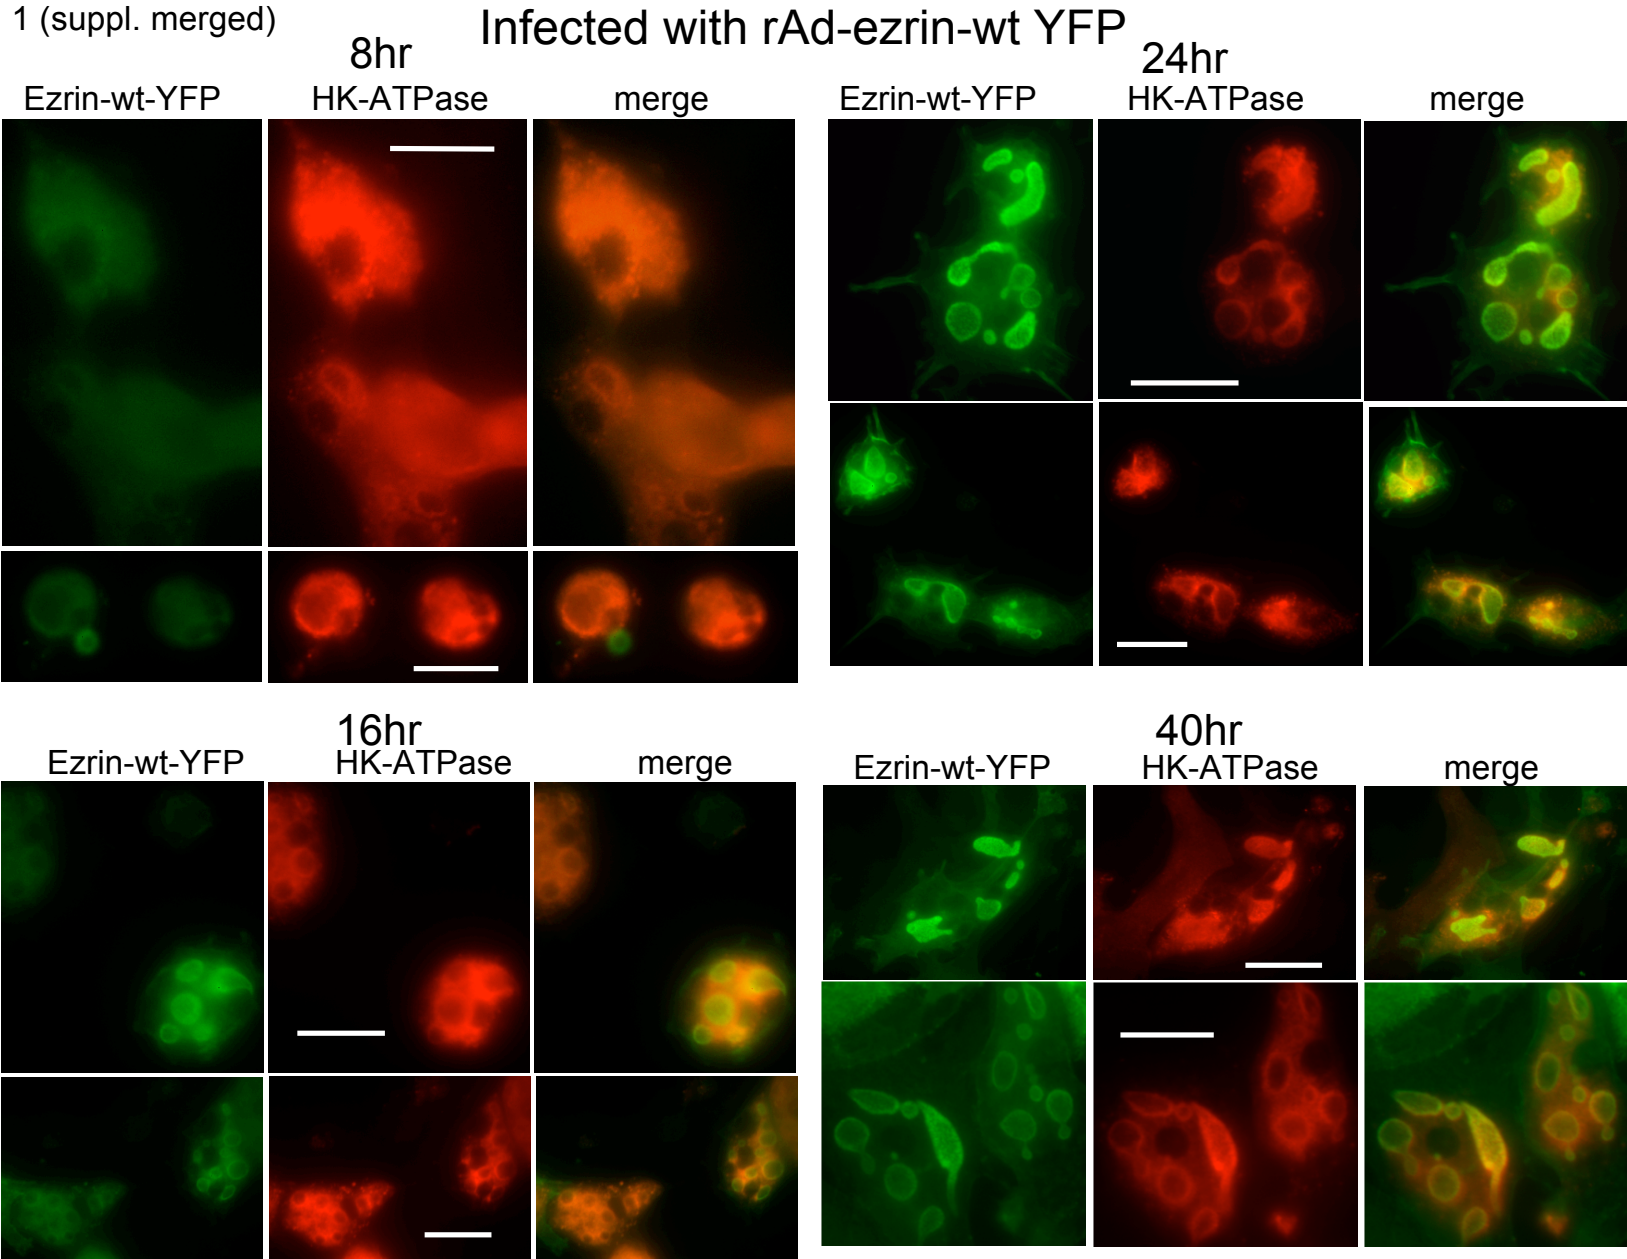

Fig. 3 (suppl. merged)

### Infected with rAd-ezrin-TA mutant CFP

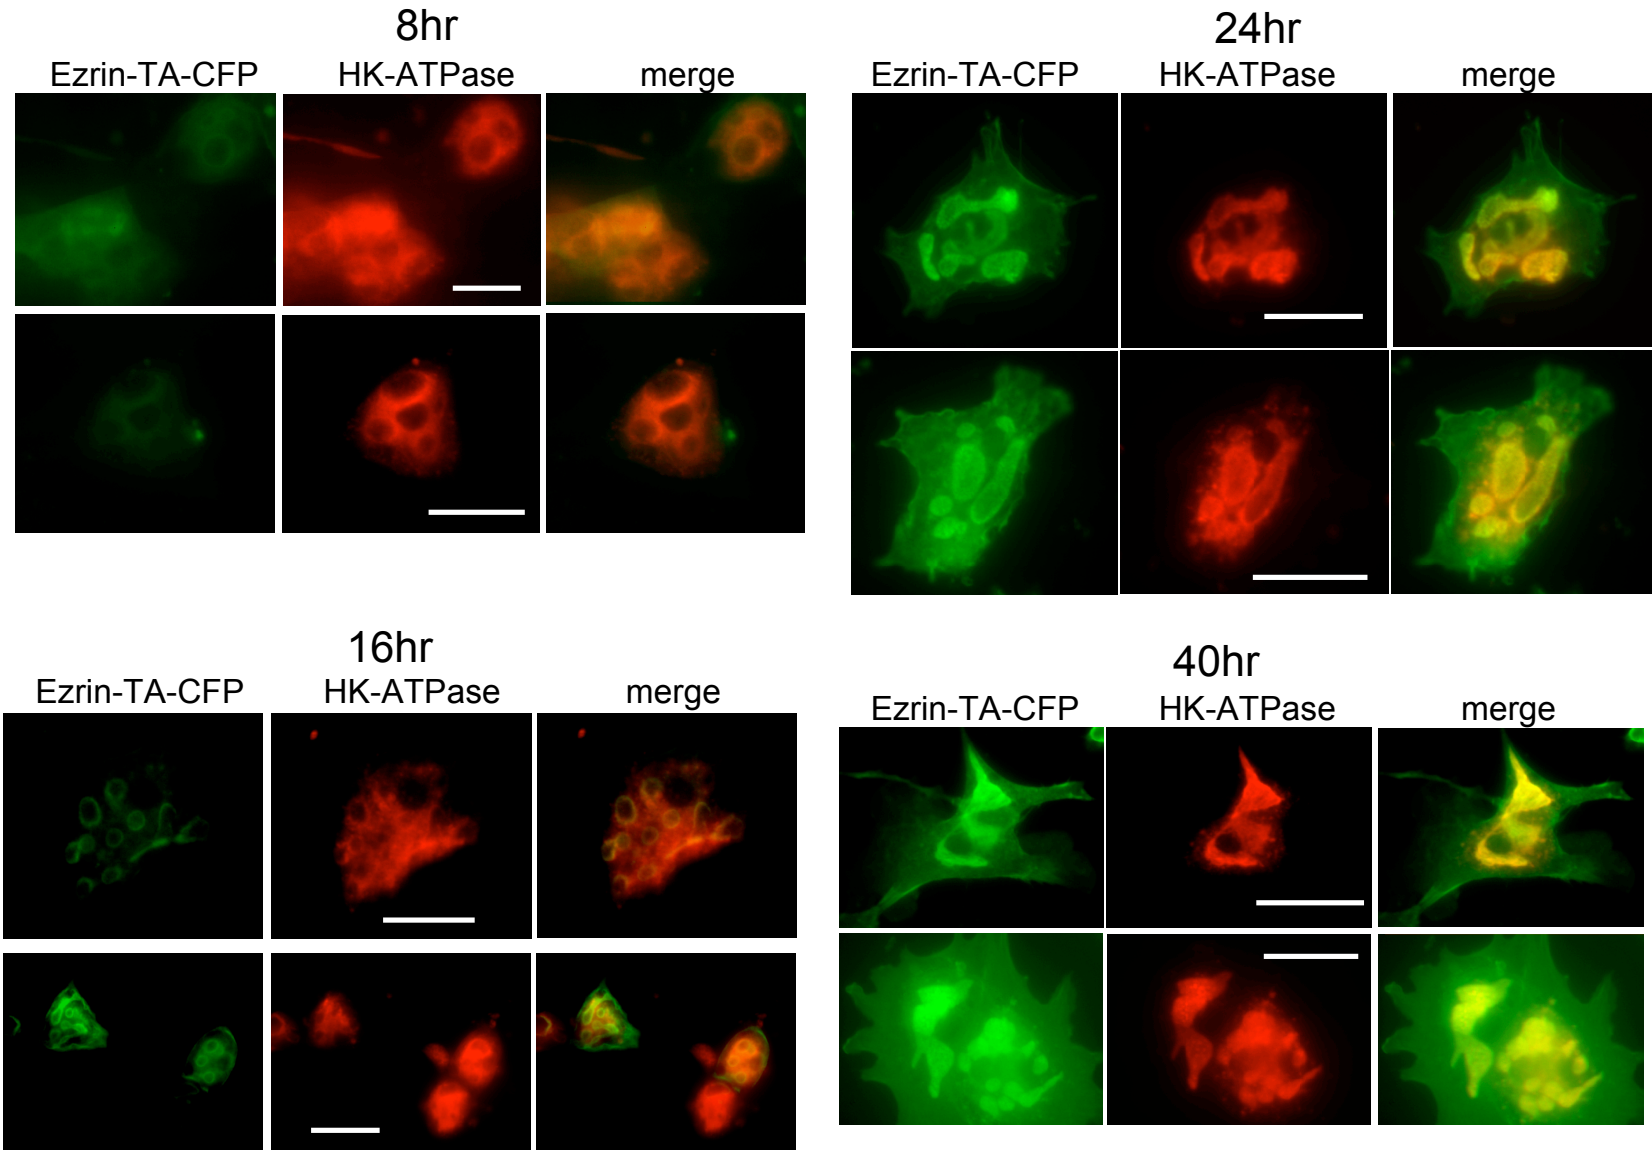

Fig. 4 (suppl. Merged)

Infected with rAd-ezrin-TD mutant CFP

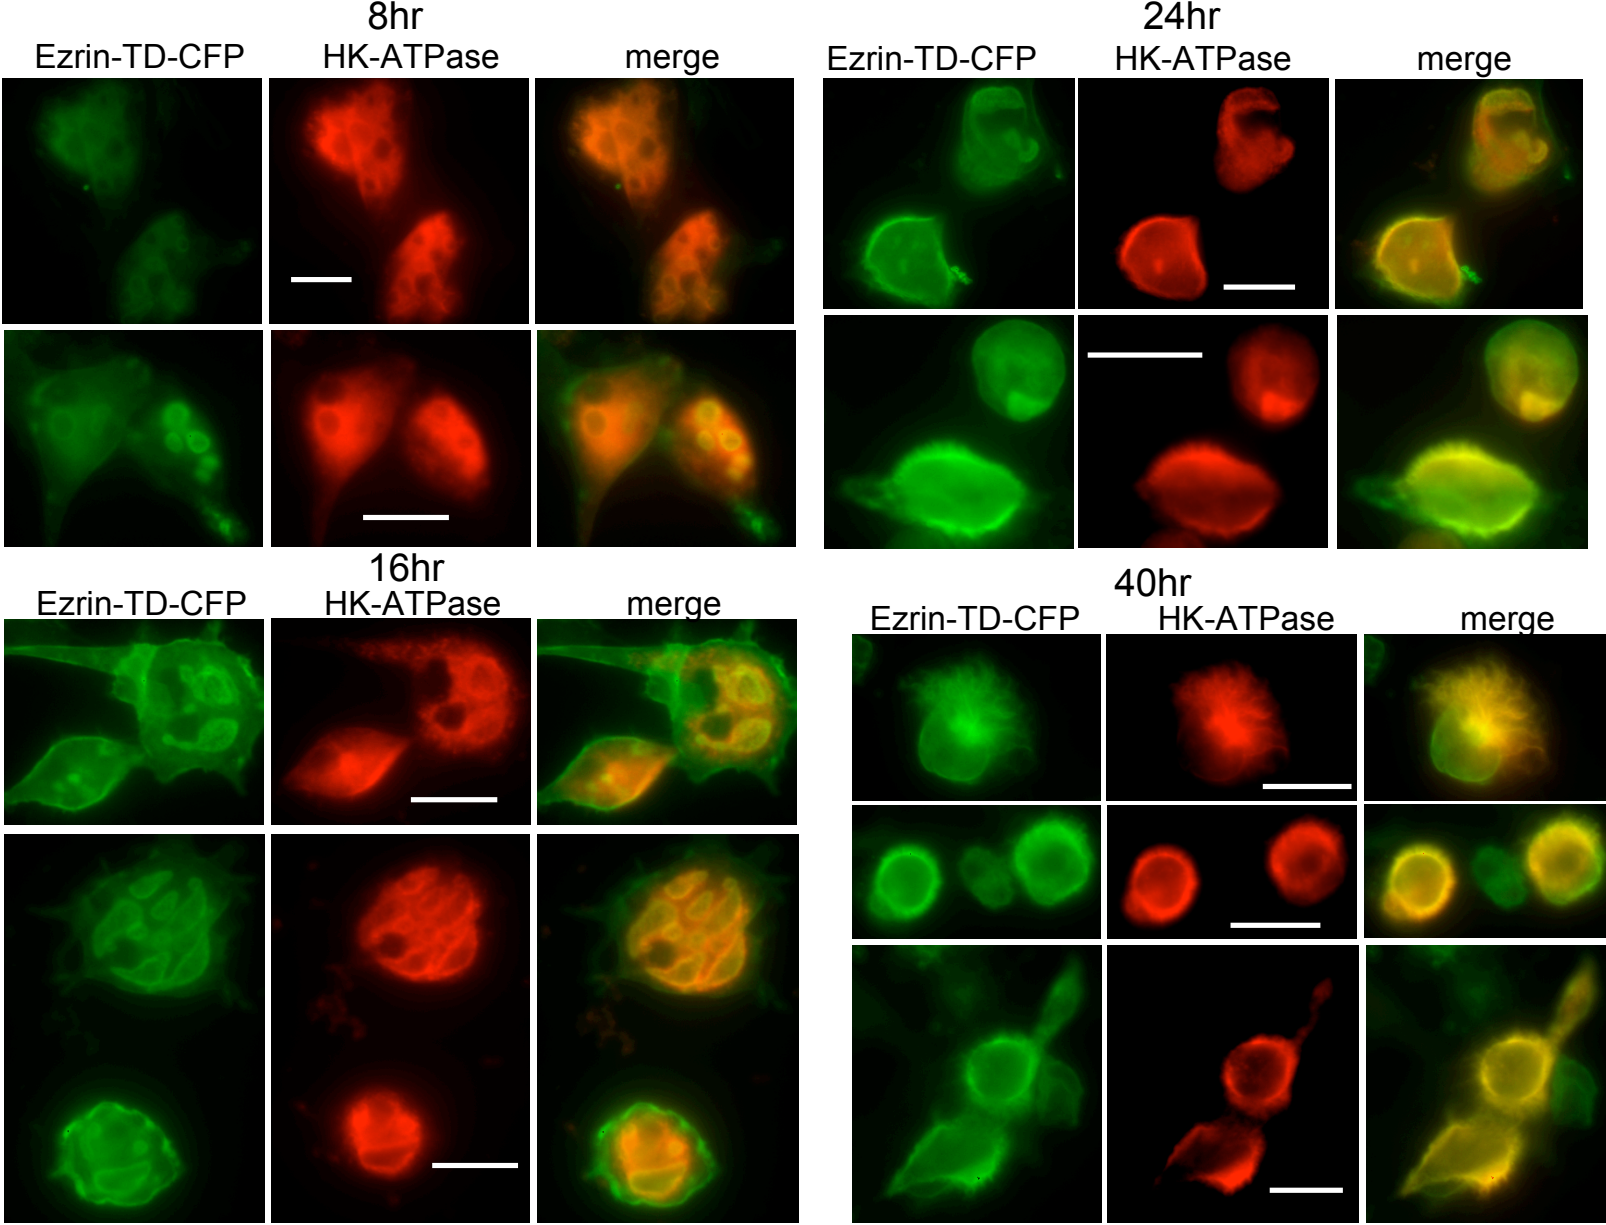

Supplement: 00090.2010_2.pdf [file 00090.2010_2.pdf]
